# Supplementary material
Source: PubMed Central journal article supplement (PMC3083795)
Supplement: JCI46110sd.pdf [file JCI46110sd.pdf]

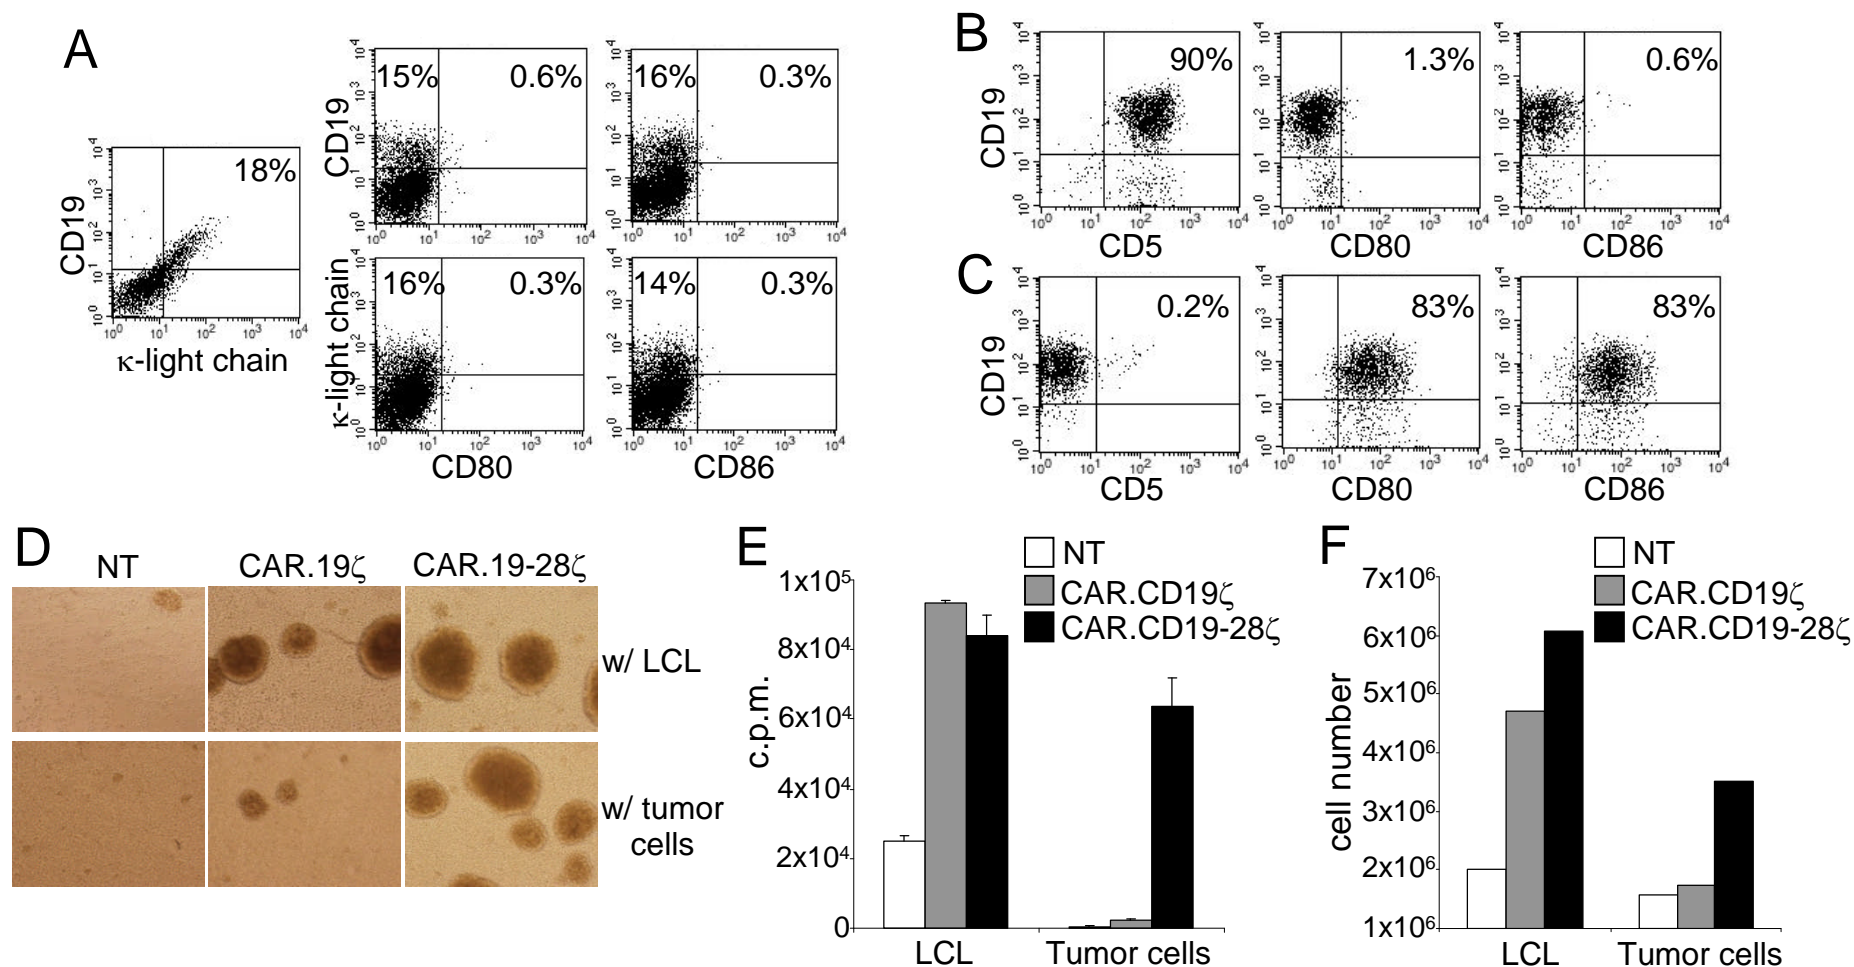

**Supplementary Figure 1. Role of CD28 costimulation in vitro.** The expression of CD80 and CD86 molecules was assessed by FACS analysis in two fresh preinfusion tissues available from Pt #2 (panel A) and Pt #1 (panel B). In both cases monoclonal CD19<sup>+</sup> tumor cells lacked CD80 and CD86 expression. Panel C illustrates that Epstein Barr Virus infected cells (LCLs) obtained from Pt #1 expressed CD80 and CD86 molecules. Panel D shows NT, CAR.CD19 $\zeta$ <sup>+</sup> and CAR.CD19-28 $\zeta$ <sup>+</sup> T cells from Pt #1 co-cultured with autologous LCLs or autologous tumor cells (ratio 1 to 1). Both CAR.CD19 $\zeta$ <sup>+</sup> and CAR.CD19-28 $\zeta$ <sup>+</sup> T cells (expressing the native CD28 as shown in Fig. 1) proliferated in the presence of LCLs, while only CAR.CD19-28 $\zeta$ <sup>+</sup> T cells proliferated in response to tumor cells (magnification 10X). Thymidine incorporation at 72 h (panel E) and cell counts 1 week (panel F) post stimulation with LCLs or primary tumor cells confirmed that only CAR.CD19-28 $\zeta$ <sup>+</sup> T cells proliferated in response to tumor cells while both CAR.CD19 $\zeta$ <sup>+</sup> and CAR.CD19-28 $\zeta$ <sup>+</sup> T cells proliferated in response to LCLs. These data confirm that CD28 endodomain incorporated within the CAR is essential to provide co-stimulation when the tumor cells lack the expression of co-stimulatory molecules.

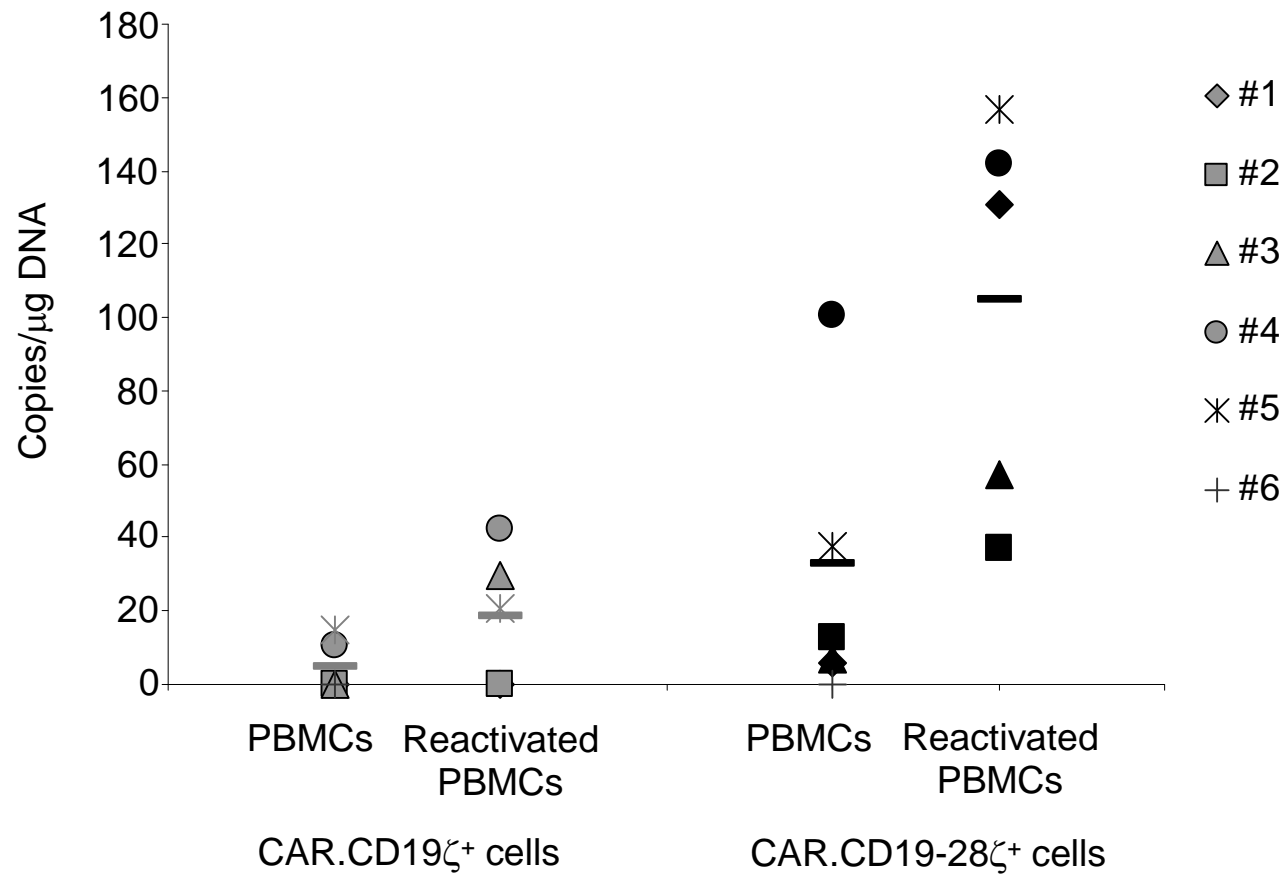

**Supplementary Figure 2. Reactivation of CAR-modified T lymphocytes ex vivo.** PBMCs were collected at 4-6 weeks after the first T-cell infusion and were stimulated ex vivo with immobilized OKT3/CD28 antibodies. Each symbol represents a single patient and the horizontal bars denote mean group values. Gray symbols indicate CAR.CD19 $\zeta$ <sup>+</sup> T-cell lines. Black symbols indicate CAR.CD19-28 $\zeta$ <sup>+</sup> T-cell lines. A significant increase in molecular signals after ex vivo activation was apparent only among CAR.CD19-28 $\zeta$ <sup>+</sup> cells.

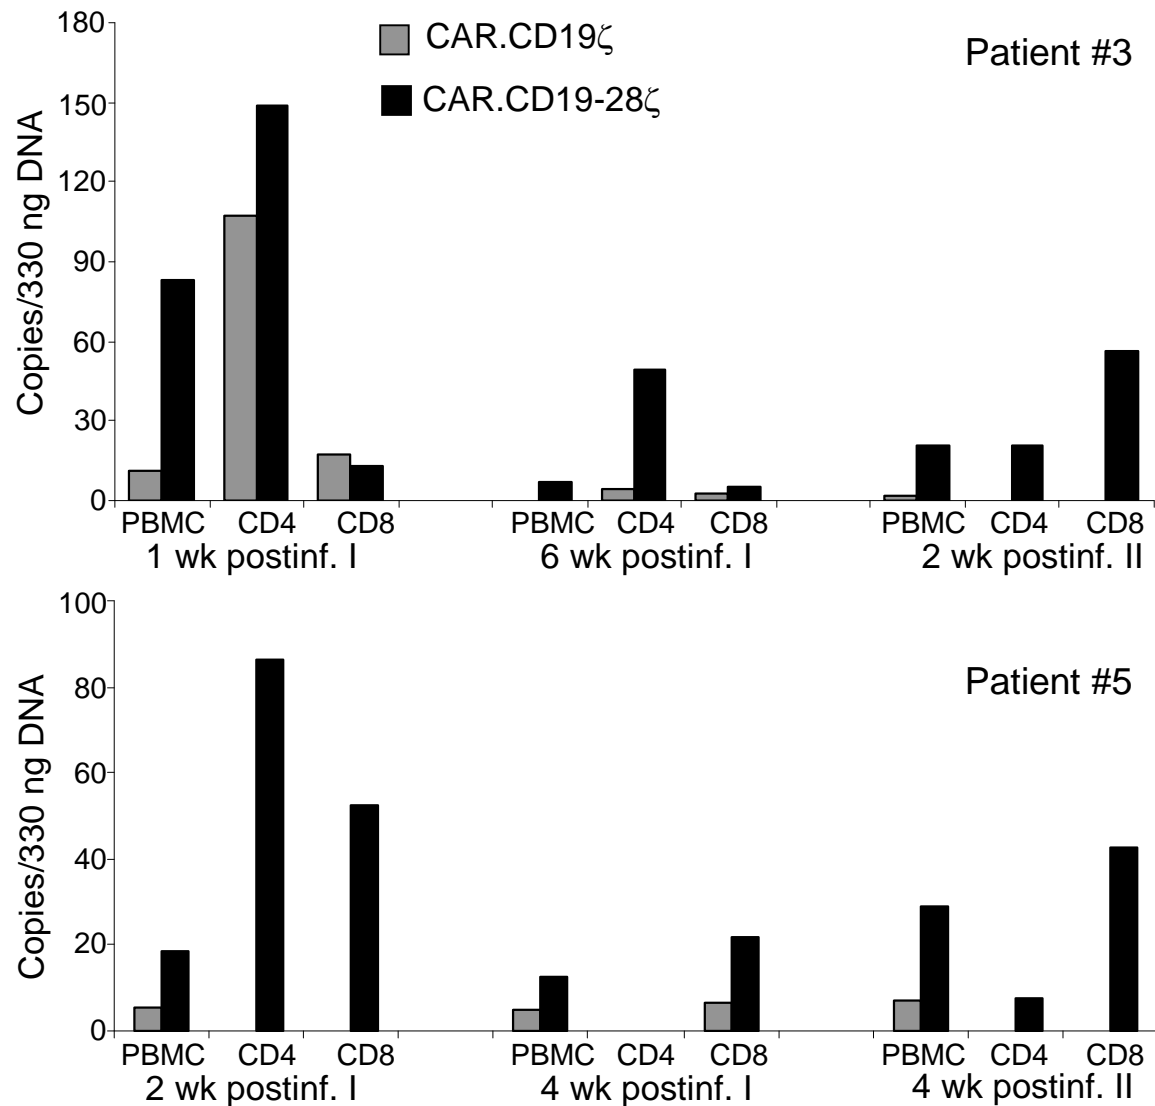

**Supplementary Figure 3. Relative contribution of CAR-transduced CD4 and CD8 subsets to expand T-cell populations at different postinfusion intervals.** CD4<sup>+</sup> and CD8<sup>+</sup> T cells were FACS sorted (TCH Core Facility, Houston, TX) from freshly isolated PBMCs at 1, 2, 4 and 6 weeks postinfusion and DNA extracted for Q-PCR amplification. The relative percentage of CD4<sup>+</sup> and CD8<sup>+</sup> cells for patient #3 were 55% and 43% among CAR.CD19 $\zeta$ <sup>+</sup> T cells vs. 57% and 42% among CAR.CD19-28 $\zeta$ <sup>+</sup> T cells. For patient #5 the corresponding percentages were 7% and 90% for the CAR.CD19 $\zeta$ <sup>+</sup> T cells vs. 10% and 85% for CAR.CD19-28 $\zeta$ <sup>+</sup> T cells.

**Supplementary Table 1. Clinical characteristics of treated patients**

| <b>Patient no.</b> | <b>Diagnosis</b>                                                    | <b>Age/Sex</b> | <b>Previous therapy</b>                     | <b>Disease status at T-cell infusion</b>                                                | <b>T-cell dose</b>                   | <b>Clinical outcome</b>                                                      |
|--------------------|---------------------------------------------------------------------|----------------|---------------------------------------------|-----------------------------------------------------------------------------------------|--------------------------------------|------------------------------------------------------------------------------|
| 1                  | Stage IVA SLL with history of EBV+ NHL                              | 53/M           | Fludarabine, cyclophosphamide and rituximab | Active disease (blood and cervical, axillary, retroperitoneal and inguinal lymph nodes) | $2 \times 10^7$ cells/m <sup>2</sup> | Stable disease 10 mo; progressive disease 6 mo post 2 <sup>nd</sup> infusion |
| 2                  | Relapsed stage IVB follicular lymphoma with transformation to DLBCL | 56/M           | Multiagent chemotherapy with rituximab      | Active disease (cervical lymph nodes)                                                   | $2 \times 10^7$ cells/m <sup>2</sup> | Progressive disease 5 wk post 1 <sup>st</sup> infusion                       |
| 3                  | Relapsed stage IIIB DLBCL                                           | 46/M           | Multiagent chemotherapy with rituximab      | Active disease (retroperitoneal lymph nodes)                                            | $1 \times 10^8$ cells/m <sup>2</sup> | Stable disease 3 mo; progressive disease 4 wk post 2 <sup>nd</sup> infusion  |

|   |                                                                     |      |                                              |                                                           |                                      |                                                         |
|---|---------------------------------------------------------------------|------|----------------------------------------------|-----------------------------------------------------------|--------------------------------------|---------------------------------------------------------|
| 4 | Relapsed/refractory stage IIA DLBCL                                 | 57/M | Multiagent chemotherapy with rituximab, ASCT | Active disease (cervical and retroperitoneal lymph nodes) | $1 \times 10^8$ cells/m <sup>2</sup> | Progressive disease 6 wk post 1 <sup>st</sup> infusion  |
| 5 | Relapsed stage IVB follicular lymphoma with transformation to DBLCL | 59/F | Multiagent chemotherapy with rituximab, ASCT | Active disease (muscle and skin)                          | $2 \times 10^8$ cells/m <sup>2</sup> | Progressive disease 6 wk after 1 <sup>st</sup> infusion |
| 6 | Relapsed primary central nervous system DLBCL with systemic relapse | 49/M | Multiagent chemotherapy with rituximab, ASCT | Active disease (brain and retroperitoneum)                | $2 \times 10^8$ cells/m <sup>2</sup> | Progressive disease 2 wk after 1 <sup>st</sup> infusion |

SLL – Small lymphocytic lymphoma; DLBCL – Diffuse large B cell lymphoma; ASCT – autologous stem cell transplant.
